# Supplementary material for: Growing evidence of Plasmodium vivax across malaria-endemic Africa
Source: PLoS Negl Trop Dis. 2019 Jan 31;13(1):e0007140. doi: 10.1371/journal.pntd.0007140 (PMC6372205; doi:10.1371/journal.pntd.0007140)
Supplement: S2 Table — NR: not reported. Rows were included in the evidence weighting if they reported at least one P. vivax infection and could be approximately geopositioned to a point location. Rows were included in the proportion analysis if the study design appeared to be unbiased to a particular parasite species, and could be assumed to be representative of the relative burdens of P. vivax and P. falciparum at that location. (XLSX) [file pntd.0007140.s011.xlsx]

## Sheet: Table_S2_community-surveys
Search year	Reference ID	Author	Publication year	URL	Year start	Year end	Country	Site	Latitude	Longitude	Study type	Diagnostic type	N tested	Pf+	Pv+	Po+	Pm+	Included in evidence weighting	Proportion analysis flag
2017	25	Bansal	2017	https://www.ncbi.nlm.nih.gov/pubmed/28257812	2013	2013	Zimbabwe	Bemberi primary school	-16.77	31.577	Unrepresentative Community Survey	PCR	27	24	1	N.R.	N.R.	Y	N
2017	46	Cook et al	2015	https://www.ncbi.nlm.nih.gov/pubmed/25429102	2012	2012	Tanzania	Various Sites in southern Unguja	-6.311	39.46	MSAT study in Zanzibar	PCR	6233	130	1	2	34	Y	Y
2017	46	Cook et al	2015	https://www.ncbi.nlm.nih.gov/pubmed/25429102	2012	2012	Tanzania	Various Sites in southern Unguja	-6.311	39.46	MSAT study in Zanzibar	PCR	4894	126	6	35	79	Y	Y
2017	78	Gabrielli	2016	https://www.ncbi.nlm.nih.gov/pubmed/26864461	2014	2014	Democratic Republic of the Congo	Tshimbulu	-6.483	22.85	Local cross-sectional survey	Microscopy/RDT	298	242	0	6	0	N	N
2017	78	Gabrielli	2016	https://www.ncbi.nlm.nih.gov/pubmed/26864461	2014	2014	Democratic Republic of the Congo	Tshimbulu	-6.483	22.85	Local cross-sectional survey	PCR	198	165	2	2	14	Y	Y
2017	86	Golassa et al	2015	https://www.ncbi.nlm.nih.gov/pubmed/26242405	2012	2012	Ethiopia	12 Different Kebeles (ADMIN4) in Shalla District	7.236	38.638	community-based cross-sectional study	Microscopy/RDT	1094	67	30	N.R.	N.R.	Y	Y
2017	86	Golassa et al	2015	https://www.ncbi.nlm.nih.gov/pubmed/26242405	2012	2012	Ethiopia	12 Different Kebeles (ADMIN4) in Shalla District	7.236	38.638	community-based cross-sectional study	Microscopy/RDT	1094	32	30	N.R.	N.R.	Y	Y
2017	86	Golassa et al	2015	https://www.ncbi.nlm.nih.gov/pubmed/26242405	2012	2012	Ethiopia	12 Different Kebeles (ADMIN4) in Shalla District	7.236	38.638	community-based cross-sectional study	PCR	94	48	33	N.R.	N.R.	Y	Y
2017	110	Kandeel et al	2016	https://www.ncbi.nlm.nih.gov/pubmed/27432410	2014	2014	Egypt	El-Sheikh Mostafa	24.9645	32.9154	Reactive case detection to a Pv case identified in Egypt.	Microscopy/RDT	164	N.R.	21	N.R.	N.R.	Y	N
2017	116	Kim et al	2015	https://www.ncbi.nlm.nih.gov/pubmed/26537036	2009	2009	Tanzania	Bugoro	-2.332	32.422	Cross-sectional survey	Microscopy/RDT	15	7	0	N.R.	N.R.	N	N
2017	116	Kim et al	2015	https://www.ncbi.nlm.nih.gov/pubmed/26537036	2009	2009	Tanzania	Buhama	-2.334	32.523	Cross-sectional survey	Microscopy/RDT	24	11	1	N.R.	N.R.	Y	Y
2017	116	Kim et al	2015	https://www.ncbi.nlm.nih.gov/pubmed/26537036	2009	2009	Tanzania	Isenyi	-2.409	32.458	Cross-sectional survey	Microscopy/RDT	29	14	2	N.R.	N.R.	Y	Y
2017	116	Kim et al	2015	https://www.ncbi.nlm.nih.gov/pubmed/26537036	2009	2009	Tanzania	Izindabo	-2.287	32.461	Cross-sectional survey	Microscopy/RDT	37	19	1	N.R.	N.R.	Y	Y
2017	116	Kim et al	2015	https://www.ncbi.nlm.nih.gov/pubmed/26537036	2009	2009	Tanzania	Kabanganga	-2.4	32.434	Cross-sectional survey	Microscopy/RDT	20	8	0	N.R.	N.R.	N	N
2017	116	Kim et al	2015	https://www.ncbi.nlm.nih.gov/pubmed/26537036	2009	2009	Tanzania	Lugata	-2.333	32.449	Cross-sectional survey	Microscopy/RDT	32	12	0	N.R.	N.R.	N	N
2017	116	Kim et al	2015	https://www.ncbi.nlm.nih.gov/pubmed/26537036	2009	2009	Tanzania	Muungano	-2.353	32.445	Cross-sectional survey	Microscopy/RDT	18	3	0	N.R.	N.R.	N	N
2017	116	Kim et al	2015	https://www.ncbi.nlm.nih.gov/pubmed/26537036	2009	2009	Tanzania	Nyakabanga	-2.34	32.481	Cross-sectional survey	Microscopy/RDT	24	9	0	N.R.	N.R.	N	N
2017	116	Kim et al	2015	https://www.ncbi.nlm.nih.gov/pubmed/26537036	2009	2009	Tanzania	Nyakasasa	-2.384	32.49	Cross-sectional survey	Microscopy/RDT	33	8	0	N.R.	N.R.	N	N
2017	116	Kim et al	2015	https://www.ncbi.nlm.nih.gov/pubmed/26537036	2009	2009	Tanzania	Nyamiswi	-2.349	32.483	Cross-sectional survey	Microscopy/RDT	12	2	0	N.R.	N.R.	N	N
2017	159	Nega et al	2015	https://www.ncbi.nlm.nih.gov/pubmed/25849587	2013	2013	Ethiopia	Arbaminch Hospital	6.0267	37.556	A community based cross-sectional study	Microscopy/RDT	341	16	19	N.R.	N.R.	Y	Y
2017	185	Ouldabdallahi	2016	https://www.ncbi.nlm.nih.gov/pubmed/27068219	2011	2011	Mauritania	Keurmassen	16.55	-16.2369	Local cross-sectional survey.	Microscopy/RDT	50	1	0	0	0	N	N
2017	185	Ouldabdallahi	2016	https://www.ncbi.nlm.nih.gov/pubmed/27068219	2012	2012	Mauritania	Keurmassen	16.55	-16.2369	Local cross-sectional survey.	Microscopy/RDT	50	0	0	0	0	N	N
2017	185	Ouldabdallahi	2016	https://www.ncbi.nlm.nih.gov/pubmed/27068219	2013	2013	Mauritania	Keurmassen	16.55	-16.2369	Local cross-sectional survey.	Microscopy/RDT	117	1	0	0	0	N	N
2017	185	Ouldabdallahi	2016	https://www.ncbi.nlm.nih.gov/pubmed/27068219	2011	2011	Mauritania	Boghé	16.5833	-14.2703	Local cross-sectional survey.	Microscopy/RDT	101	0	0	0	0	N	N
2017	185	Ouldabdallahi	2016	https://www.ncbi.nlm.nih.gov/pubmed/27068219	2012	2012	Mauritania	Boghé	16.5833	-14.2703	Local cross-sectional survey.	Microscopy/RDT	101	0	0	0	0	N	N
2017	185	Ouldabdallahi	2016	https://www.ncbi.nlm.nih.gov/pubmed/27068219	2013	2013	Mauritania	Boghé	16.5833	-14.2703	Local cross-sectional survey.	Microscopy/RDT	114	1	0	0	0	N	N
2017	185	Ouldabdallahi	2016	https://www.ncbi.nlm.nih.gov/pubmed/27068219	2011	2011	Mauritania	Gouraye	14.9	-12.4536	Local cross-sectional survey.	Microscopy/RDT	99	1	0	2	0	N	N
2017	185	Ouldabdallahi	2016	https://www.ncbi.nlm.nih.gov/pubmed/27068219	2012	2012	Mauritania	Gouraye	14.9	-12.4536	Local cross-sectional survey.	Microscopy/RDT	99	0	0	0	0	N	N
2017	185	Ouldabdallahi	2016	https://www.ncbi.nlm.nih.gov/pubmed/27068219	2013	2013	Mauritania	Gouraye	14.9	-12.4536	Local cross-sectional survey.	Microscopy/RDT	74	1	0	1	0	N	N
2017	185	Ouldabdallahi	2016	https://www.ncbi.nlm.nih.gov/pubmed/27068219	2011	2011	Mauritania	Ghabou	18.3	-15.6333	Local cross-sectional survey.	Microscopy/RDT	100	1	0	0	0	N	N
2017	185	Ouldabdallahi	2016	https://www.ncbi.nlm.nih.gov/pubmed/27068219	2012	2012	Mauritania	Ghabou	18.3	-15.6333	Local cross-sectional survey.	Microscopy/RDT	119	0	0	0	0	N	N
2017	185	Ouldabdallahi	2016	https://www.ncbi.nlm.nih.gov/pubmed/27068219	2013	2013	Mauritania	Ghabou	18.3	-15.6333	Local cross-sectional survey.	Microscopy/RDT	32	2	0	1	0	N	N
2017	185	Ouldabdallahi	2016	https://www.ncbi.nlm.nih.gov/pubmed/27068219	2011	2011	Mauritania	Kobeni	15.8167	-9.4	Local cross-sectional survey.	Microscopy/RDT	105	3	4	2	0	Y	Y
2017	185	Ouldabdallahi	2016	https://www.ncbi.nlm.nih.gov/pubmed/27068219	2012	2012	Mauritania	Kobeni	15.8167	-9.4	Local cross-sectional survey.	Microscopy/RDT	111	0	0	0	0	N	N
2017	185	Ouldabdallahi	2016	https://www.ncbi.nlm.nih.gov/pubmed/27068219	2013	2013	Mauritania	Kobeni	15.8167	-9.4	Local cross-sectional survey.	Microscopy/RDT	129	18	0	1	0	N	N
2017	185	Ouldabdallahi	2016	https://www.ncbi.nlm.nih.gov/pubmed/27068219	2011	2011	Mauritania	Tamcheket	17.2333	-10.6667	Local cross-sectional survey.	Microscopy/RDT	102	2	6	1	0	Y	Y
2017	185	Ouldabdallahi	2016	https://www.ncbi.nlm.nih.gov/pubmed/27068219	2012	2012	Mauritania	Tamcheket	17.2333	-10.6667	Local cross-sectional survey.	Microscopy/RDT	105	0	0	0	0	N	N
2017	185	Ouldabdallahi	2016	https://www.ncbi.nlm.nih.gov/pubmed/27068219	2013	2013	Mauritania	Tamcheket	17.2333	-10.6667	Local cross-sectional survey.	Microscopy/RDT	105	5	4	0	0	Y	Y
2017	185	Ouldabdallahi	2016	https://www.ncbi.nlm.nih.gov/pubmed/27068219	2011	2011	Mauritania	Kankossa	15.9333	-11.5167	Local cross-sectional survey.	Microscopy/RDT	104	8	2	0	0	Y	Y
2017	185	Ouldabdallahi	2016	https://www.ncbi.nlm.nih.gov/pubmed/27068219	2012	2012	Mauritania	Kankossa	15.9333	-11.5167	Local cross-sectional survey.	Microscopy/RDT	109	0	0	0	0	N	N
2017	185	Ouldabdallahi	2016	https://www.ncbi.nlm.nih.gov/pubmed/27068219	2013	2013	Mauritania	Kankossa	15.9333	-11.5167	Local cross-sectional survey.	Microscopy/RDT	124	12	0	1	0	N	N
2017	185	Ouldabdallahi	2016	https://www.ncbi.nlm.nih.gov/pubmed/27068219	2011	2011	Mauritania	Nbeika	17.9833	-12.25	Local cross-sectional survey.	Microscopy/RDT	96	5	0	0	0	N	N
2017	185	Ouldabdallahi	2016	https://www.ncbi.nlm.nih.gov/pubmed/27068219	2012	2012	Mauritania	Nbeika	17.9833	-12.25	Local cross-sectional survey.	Microscopy/RDT	126	0	0	0	0	N	N
2017	185	Ouldabdallahi	2016	https://www.ncbi.nlm.nih.gov/pubmed/27068219	2013	2013	Mauritania	Nbeika	17.9833	-12.25	Local cross-sectional survey.	Microscopy/RDT	114	9	0	0	0	N	N
2017	185	Ouldabdallahi	2016	https://www.ncbi.nlm.nih.gov/pubmed/27068219	2011	2011	Mauritania	Teyarett	18.1	-15.95	Local cross-sectional survey.	Microscopy/RDT	109	1	15	2	0	Y	Y
2017	185	Ouldabdallahi	2016	https://www.ncbi.nlm.nih.gov/pubmed/27068219	2012	2012	Mauritania	Teyarett	18.1	-15.95	Local cross-sectional survey.	Microscopy/RDT	116	0	3	0	0	Y	Y
2017	185	Ouldabdallahi	2016	https://www.ncbi.nlm.nih.gov/pubmed/27068219	2013	2013	Mauritania	Teyarett	18.1	-15.95	Local cross-sectional survey.	Microscopy/RDT	109	0	8	0	0	Y	Y
2017	185	Ouldabdallahi	2016	https://www.ncbi.nlm.nih.gov/pubmed/27068219	2011	2011	Mauritania	Darnaim	18.1	-15.95	Local cross-sectional survey.	Microscopy/RDT	119	0	9	0	0	Y	Y
2017	185	Ouldabdallahi	2016	https://www.ncbi.nlm.nih.gov/pubmed/27068219	2012	2012	Mauritania	Darnaim	18.1	-15.95	Local cross-sectional survey.	Microscopy/RDT	125	0	0	0	0	N	N
2017	185	Ouldabdallahi	2016	https://www.ncbi.nlm.nih.gov/pubmed/27068219	2013	2013	Mauritania	Darnaim	18.1	-15.95	Local cross-sectional survey.	Microscopy/RDT	119	0	5	0	0	Y	Y
2017	185	Ouldabdallahi	2016	https://www.ncbi.nlm.nih.gov/pubmed/27068219	2011	2011	Mauritania	Aoujeft	19.9667	-13.0667	Local cross-sectional survey.	Microscopy/RDT	146	0	2	0	0	Y	Y
2017	185	Ouldabdallahi	2016	https://www.ncbi.nlm.nih.gov/pubmed/27068219	2012	2012	Mauritania	Aoujeft	19.9667	-13.0667	Local cross-sectional survey.	Microscopy/RDT	107	0	0	0	0	N	N
2017	185	Ouldabdallahi	2016	https://www.ncbi.nlm.nih.gov/pubmed/27068219	2013	2013	Mauritania	Aoujeft	19.9667	-13.0667	Local cross-sectional survey.	Microscopy/RDT	59	0	1	0	0	Y	Y
2017	185	Ouldabdallahi	2016	https://www.ncbi.nlm.nih.gov/pubmed/27068219	2011	2011	Mauritania	Akjoujt	19.75	-14.3833	Local cross-sectional survey.	Microscopy/RDT	50	0	0	0	0	N	N
2017	203	Scott	2016	https://www.ncbi.nlm.nih.gov/pubmed/27255330	2014	2014	Ethiopia	Berhan Chora kebele	11.5642	37.0911	Purposive sampling of villages in Amhara region for one round of MTAT	Microscopy/RDT	2073	1	1	N.R.	N.R.	Y	Y
2017	203	Scott	2016	https://www.ncbi.nlm.nih.gov/pubmed/27255330	2014	2014	Ethiopia	Berhan Chora kebele	11.5642	37.0911	Purposive sampling of villages in Amhara region for one round of MTAT	Microscopy/RDT	5115	15	9	N.R.	N.R.	Y	Y
2017	203	Scott	2016	https://www.ncbi.nlm.nih.gov/pubmed/27255330	2014	2014	Ethiopia	Choresa kebele	10.9162	39.6725	Purposive sampling of villages in Amhara region for one round of MTAT	Microscopy/RDT	855	3	1	N.R.	N.R.	Y	Y
2017	203	Scott	2016	https://www.ncbi.nlm.nih.gov/pubmed/27255330	2014	2014	Ethiopia	Choresa kebele	10.9162	39.6725	Purposive sampling of villages in Amhara region for one round of MTAT	Microscopy/RDT	2750	4	2	N.R.	N.R.	Y	Y
2017	203	Scott	2016	https://www.ncbi.nlm.nih.gov/pubmed/27255330	2014	2014	Ethiopia	Dehina Sositu kebele	11.5743	37.3687	Purposive sampling of villages in Amhara region for one round of MTAT	Microscopy/RDT	2625	20	23	N.R.	N.R.	Y	Y
2017	203	Scott	2016	https://www.ncbi.nlm.nih.gov/pubmed/27255330	2014	2014	Ethiopia	Dehina Sositu kebele	11.5743	37.3687	Purposive sampling of villages in Amhara region for one round of MTAT	Microscopy/RDT	5140	24	15	N.R.	N.R.	Y	Y
2017	203	Scott	2016	https://www.ncbi.nlm.nih.gov/pubmed/27255330	2014	2014	Ethiopia	Kumer Aftit kebele	12.7759	36.3251	Purposive sampling of villages in Amhara region for one round of MTAT	Microscopy/RDT	850	33	17	N.R.	N.R.	Y	Y
2017	203	Scott	2016	https://www.ncbi.nlm.nih.gov/pubmed/27255330	2014	2014	Ethiopia	Kumer Aftit kebele	12.7759	36.3251	Purposive sampling of villages in Amhara region for one round of MTAT	Microscopy/RDT	2151	104	39	N.R.	N.R.	Y	Y
2017	203	Scott	2016	https://www.ncbi.nlm.nih.gov/pubmed/27255330	2014	2014	Ethiopia	Yeginid Lomi kebele	11.4159	37.5494	Purposive sampling of villages in Amhara region for one round of MTAT	Microscopy/RDT	1555	58	38	N.R.	N.R.	Y	Y
2017	203	Scott	2016	https://www.ncbi.nlm.nih.gov/pubmed/27255330	2014	2014	Ethiopia	Yeginid Lomi kebele	11.4159	37.5494	Purposive sampling of villages in Amhara region for one round of MTAT	Microscopy/RDT	4051	57	27	N.R.	N.R.	Y	Y
2017	203	Scott	2016	https://www.ncbi.nlm.nih.gov/pubmed/27255330	2014	2014	Ethiopia	Zengoba kebele	10.2838	37.9098	Purposive sampling of villages in Amhara region for one round of MTAT	Microscopy/RDT	980	1	10	N.R.	N.R.	Y	Y
2017	203	Scott	2016	https://www.ncbi.nlm.nih.gov/pubmed/27255330	2014	2014	Ethiopia	Zengoba kebele	10.2838	37.9098	Purposive sampling of villages in Amhara region for one round of MTAT	Microscopy/RDT	2564	2	17	N.R.	N.R.	Y	Y
2017	214	Tadesse	2015	https://www.ncbi.nlm.nih.gov/pubmed/26242243	2014	2014	Ethiopia	Village 1: Tatta-qirchiqircho	6.43333	36.6356	Community based cross-sectional	Microscopy/RDT	257	0	0	N.R.	N.R.	N	N
2017	214	Tadesse	2015	https://www.ncbi.nlm.nih.gov/pubmed/26242243	2014	2014	Ethiopia	Village 1: Tatta-qirchiqircho	6.43333	36.6356	Community based cross-sectional	Microscopy/RDT	257	0	0	N.R.	N.R.	N	N
2017	214	Tadesse	2015	https://www.ncbi.nlm.nih.gov/pubmed/26242243	2014	2014	Ethiopia	Village 1: Tatta-qirchiqircho	6.43333	36.6356	Community based cross-sectional	PCR	257	16	20	N.R.	N.R.	Y	Y
2017	214	Tadesse	2015	https://www.ncbi.nlm.nih.gov/pubmed/26242243	2014	2014	Ethiopia	Village 2: Salayish Mender 4	6.43333	36.6356	Community based cross-sectional	Microscopy/RDT	298	0	0	N.R.	N.R.	N	N
2017	214	Tadesse	2015	https://www.ncbi.nlm.nih.gov/pubmed/26242243	2014	2014	Ethiopia	Village 2: Salayish Mender 4	6.43333	36.6356	Community based cross-sectional	Microscopy/RDT	298	0	0	N.R.	N.R.	N	N
2017	214	Tadesse	2015	https://www.ncbi.nlm.nih.gov/pubmed/26242243	2014	2014	Ethiopia	Village 2: Salayish Mender 4	6.43333	36.6356	Community based cross-sectional	PCR	298	14	5	N.R.	N.R.	Y	Y
2017	229	Wale	2016	https://www.ncbi.nlm.nih.gov/pubmed/27681544	2014	2014	Ethiopia	Villages in Yaso district	10.0393	36.013	Cross-sectional household survey	Microscopy/RDT	384	154	132	N.R.	N.R.	Y	Y
2017	238	Yimer	2015	https://www.ncbi.nlm.nih.gov/pubmed/26037129	2013	2013	Ethiopia	4 rural kebeles in Abeshge District	8.30561	37.6124	Cross-sectional household survey	Microscopy/RDT	400	1	1	N.R.	N.R.	Y	Y
2017	240	Zhou	2016	https://www.ncbi.nlm.nih.gov/pubmed/27129785	2014	2014	Ethiopia	Jimma Town	7.67603	36.8376	Seasonal cross-sectional curvey	Microscopy/RDT	622	5	12	N.R.	N.R.	Y	Y
2017	240	Zhou	2016	https://www.ncbi.nlm.nih.gov/pubmed/27129785	2015	2015	Ethiopia	Jimma Town	7.67603	36.8376	Seasonal cross-sectional curvey	Microscopy/RDT	755	0	0	N.R.	N.R.	N	N
2017	240	Zhou	2016	https://www.ncbi.nlm.nih.gov/pubmed/27129785	2015	2015	Ethiopia	Jimma Town	7.67603	36.8376	Seasonal cross-sectional curvey	Microscopy/RDT	833	0	0	N.R.	N.R.	N	N
2017	240	Zhou	2016	https://www.ncbi.nlm.nih.gov/pubmed/27129785	2015	2015	Ethiopia	Jimma Town	7.67603	36.8376	Seasonal cross-sectional curvey	PCR	727	9	10	N.R.	N.R.	Y	Y
2017	240	Zhou	2016	https://www.ncbi.nlm.nih.gov/pubmed/27129785	2015	2015	Ethiopia	Jimma Town	7.67603	36.8376	Seasonal cross-sectional curvey	PCR	290	4	1	N.R.	N.R.	Y	Y
2017	250	Hayashida	2017	https://www.ncbi.nlm.nih.gov/pubmed/28086864	2013	2013	Zambia	Shikabeta	-14.9534	29.8319	Voluntary participation in sampling	PCR	61	29	1	9	22	Y	Y
2017	335	Motshoge	2016	https://www.ncbi.nlm.nih.gov/pubmed/27682611	2012	2012	Botswana	Okavango District	-18.9844	22.035	Cross-sectional study	PCR	208	1	1	N.R.	0	Y	Y
2017	335	Motshoge	2016	https://www.ncbi.nlm.nih.gov/pubmed/27682611	2012	2012	Botswana	Ngami District	-19.7629	23.323	Cross-sectional study	PCR	80	1	1	N.R.	0	Y	Y
2017	335	Motshoge	2016	https://www.ncbi.nlm.nih.gov/pubmed/27682611	2012	2012	Botswana	Tutume District	-20.5127	26.0883	Cross-sectional study	PCR	320	0	54	N.R.	2	Y	Y
2017	335	Motshoge	2016	https://www.ncbi.nlm.nih.gov/pubmed/27682611	2012	2012	Botswana	Boteti District	N.R.	N.R.	Cross-sectional study	PCR	181	0	0	N.R.	0	N	N
2017	335	Motshoge	2016	https://www.ncbi.nlm.nih.gov/pubmed/27682611	2012	2012	Botswana	Bobirwa District	N.R.	N.R.	Cross-sectional study	PCR	203	0	0	N.R.	0	N	N
2017	335	Motshoge	2016	https://www.ncbi.nlm.nih.gov/pubmed/27682611	2012	2012	Botswana	North East District	N.R.	N.R.	Cross-sectional study	PCR	160	0	0	N.R.	0	N	N
2017	335	Motshoge	2016	https://www.ncbi.nlm.nih.gov/pubmed/27682611	2012	2012	Botswana	Francistown District	-21.0119	27.5929	Cross-sectional study	PCR	195	0	4	N.R.	1	Y	Y
2017	335	Motshoge	2016	https://www.ncbi.nlm.nih.gov/pubmed/27682611	2012	2012	Botswana	Serowe-Palapye District	-22.2457	26.7502	Cross-sectional study	PCR	361	1	11	N.R.	0	Y	Y
2017	335	Motshoge	2016	https://www.ncbi.nlm.nih.gov/pubmed/27682611	2012	2012	Botswana	Ghanzi District	N.R.	N.R.	Cross-sectional study	PCR	163	0	0	N.R.	0	N	N
2017	335	Motshoge	2016	https://www.ncbi.nlm.nih.gov/pubmed/27682611	2012	2012	Botswana	Kweneng West District	N.R.	N.R.	Cross-sectional study	PCR	375	1	0	N.R.	0	N	N
2017	335	Motshoge	2016	https://www.ncbi.nlm.nih.gov/pubmed/27682611	2012	2012	Botswana	Kweneng East District	-23.9332	25.5801	Cross-sectional study	PCR	687	0	93	N.R.	3	Y	Y
2017	335	Motshoge	2016	https://www.ncbi.nlm.nih.gov/pubmed/27682611	2012	2012	Botswana	Kgatleng District	N.R.	N.R.	Cross-sectional study	PCR	358	0	0	N.R.	0	N	N
2017	335	Motshoge	2016	https://www.ncbi.nlm.nih.gov/pubmed/27682611	2012	2012	Botswana	South East District	-24.9359	25.8148	Cross-sectional study	PCR	174	0	5	N.R.	0	Y	Y
2017	335	Motshoge	2016	https://www.ncbi.nlm.nih.gov/pubmed/27682611	2012	2012	Botswana	Good Hope District	N.R.	N.R.	Cross-sectional study	PCR	159	0	0	N.R.	0	N	N
2017	411	Yalew	2017	https://www.ncbi.nlm.nih.gov/pubmed/28595603	2013	2013	Ethiopia	16 woredas in Amhara region. Found the centroid of the entire region	11.6538	38.3658	Cross-sectional household survey	Microscopy/RDT	7878	124	39	N.R.	N.R.	Y	Y
2017	417	Tadesse	2017	https://www.ncbi.nlm.nih.gov/pubmed/28253867	2015	2015	Ethiopia	Centroid of 5 schools	11.477	36.869	School surveys	PCR	551	43	13	N.R.	N.R.	Y	Y
2017	417	Tadesse	2017	https://www.ncbi.nlm.nih.gov/pubmed/28253867	2015	2015	Ethiopia	Centroid of 3 schools	11.427	36.8	School surveys	PCR	294	38	14	N.R.	N.R.	Y	Y
2017	431	Lo	2015	http://www.ncbi.nlm.nih.gov/pubmed/25884875	2013	2013	Ethiopia	Asendabo town	7.77357	37.2331	NA	PCR	72	13	10	N.R.	N.R.	Y	Y
2017	431	Lo	2015	http://www.ncbi.nlm.nih.gov/pubmed/25884875	2013	2013	Ethiopia	Asendabo town	7.77357	37.2331	NA	PCR	128	10	9	N.R.	N.R.	Y	Y
2017	431	Lo	2015	http://www.ncbi.nlm.nih.gov/pubmed/25884875	2013	2013	Ethiopia	Asendabo town	7.77357	37.2331	NA	PCR	190	27	5	N.R.	N.R.	Y	Y
2017	462	Debo	2016	https://www.ncbi.nlm.nih.gov/pubmed/28883960	2011	2012	Ethiopia	Benna Tsemay District	5.51944	36.7353	Community based cross-sectional	Microscopy/RDT	461	22	10	N.R.	N.R.	Y	Y
2017	596	Getawen	2018	https://www.ncbi.nlm.nih.gov/pubmed/29452110	2015	2015	Ethiopia	2 sub-villages in Arba Minch town	6.0267	37.556	Case-control study with baseline prevalence survey. Includes mixed infections	Microscopy/RDT	396	11	6	N.R.	N.R.	Y	Y
2017	596	Getawen	2018	https://www.ncbi.nlm.nih.gov/pubmed/29452110	2016	2016	Ethiopia	2 sub-villages in Arba Minch town	6.0267	37.556	477 subjects enrolled and followed through the case-control study. Each house visited 2x/month for 6 months. RDT performed if participant had temp > 37.5, verified with microscopy. This is total numbers positive (includes both control and intervention arms)	Microscopy/RDT	477	36	9	N.R.	N.R.	Y	Y
2017	598	Tadesse	2018	https://www.ncbi.nlm.nih.gov/pubmed/29304258	2016	2016	Ethiopia	Batu Degaga kebelle	8.43142	39.3995	Comparison of infectivity of symptomatic patients presenting at clinic vs. asymptomatic (detected in community survey)	Microscopy/RDT	490	17	34	N.R.	N.R.	Y	Y
2017	598	Tadesse	2018	https://www.ncbi.nlm.nih.gov/pubmed/29304258	2016	2016	Ethiopia	Batu Degaga kebelle	8.43142	39.3995	Comparison of infectivity of symptomatic patients presenting at clinic vs. asymptomatic (detected in community survey)	PCR	487	45	60	N.R.	N.R.	Y	Y
2017	637	MISAU	2018	https://dhsprogram.com/pubs/pdf/AIS12/AIS12.pdf	2015	2015	Mozambique	Cabo delgado	-12.3899	39.5376	DHS prevalence survey	Microscopy/RDT	356	102.528	15.308	N.R.	N.R.	Y	Y
2017	637	MISAU	2018	https://dhsprogram.com/pubs/pdf/AIS12/AIS12.pdf	2015	2015	Mozambique	Nampula	-14.9746	39.348	DHS prevalence survey	Microscopy/RDT	1134	743.904	4.536	N.R.	N.R.	Y	Y
2017	637	MISAU	2018	https://dhsprogram.com/pubs/pdf/AIS12/AIS12.pdf	2015	2015	Mozambique	Zambezia	-16.5238	37.0436	DHS prevalence survey	Microscopy/RDT	581	392.756	1.743	N.R.	N.R.	Y	Y
2017	637	MISAU	2018	https://dhsprogram.com/pubs/pdf/AIS12/AIS12.pdf	2015	2015	Mozambique	Tete	-15.4633	33.0123	DHS prevalence survey	Microscopy/RDT	375	112.875	1.125	N.R.	N.R.	Y	Y
2017	637	MISAU	2018	https://dhsprogram.com/pubs/pdf/AIS12/AIS12.pdf	2015	2015	Mozambique	Inhambane	-22.8381	34.567	DHS prevalence survey	Microscopy/RDT	318	72.504	1.59	N.R.	N.R.	Y	Y
2017	637	MISAU	2018	https://dhsprogram.com/pubs/pdf/AIS12/AIS12.pdf	2015	2015	Mozambique	Gaza	-23.7223	33.1013	DHS prevalence survey	Microscopy/RDT	399	65.037	1.197	N.R.	N.R.	Y	Y
2017	637	MISAU	2018	https://dhsprogram.com/pubs/pdf/AIS12/AIS12.pdf	2015	2015	Mozambique	Manica	-18.8315	33.383	DHS prevalence survey	Microscopy/RDT	405	102.06	1.215	N.R.	N.R.	Y	Y
2017	641	MINSA	2017	https://dhsprogram.com/pubs/pdf/FR327/FR327.pdf	2015	2016	Angola	Cabinda	-5.03803	12.3538	DHS prevalence survey	Microscopy/RDT	148	28.12	1	N.R.	N.R.	Y	Y
2017	641	MINSA	2017	https://dhsprogram.com/pubs/pdf/FR327/FR327.pdf	2015	2016	Angola	Uige	-7.01836	15.4666	DHS prevalence survey	Microscopy/RDT	385	115.115	5.005	N.R.	N.R.	Y	Y
2017	641	MINSA	2017	https://dhsprogram.com/pubs/pdf/FR327/FR327.pdf	2015	2016	Angola	Luanda	-8.95325	13.3368	DHS prevalence survey	Microscopy/RDT	1758	94.932	8.79	N.R.	N.R.	Y	Y
2017	641	MINSA	2017	https://dhsprogram.com/pubs/pdf/FR327/FR327.pdf	2015	2016	Angola	Cuanza Norte	-8.86984	14.8979	DHS prevalence survey	Microscopy/RDT	100	32.6	2.8	N.R.	N.R.	Y	Y
2017	641	MINSA	2017	https://dhsprogram.com/pubs/pdf/FR327/FR327.pdf	2015	2016	Angola	Cuanza Sul	-10.9003	15.0834	DHS prevalence survey	Microscopy/RDT	518	133.126	2.59	N.R.	N.R.	Y	Y
2017	641	MINSA	2017	https://dhsprogram.com/pubs/pdf/FR327/FR327.pdf	2015	2016	Angola	Malanje	-9.72665	16.8825	DHS prevalence survey	Microscopy/RDT	326	71.394	1.304	N.R.	N.R.	Y	Y
2017	641	MINSA	2017	https://dhsprogram.com/pubs/pdf/FR327/FR327.pdf	2015	2016	Angola	Lunda Norte	-8.66369	19.5647	DHS prevalence survey	Microscopy/RDT	207	43.263	1	N.R.	N.R.	Y	Y
2017	641	MINSA	2017	https://dhsprogram.com/pubs/pdf/FR327/FR327.pdf	2015	2016	Angola	Moxico	-12.9182	20.8208	DHS prevalence survey	Microscopy/RDT	169	66.586	1	N.R.	N.R.	Y	Y
2017	641	MINSA	2017	https://dhsprogram.com/pubs/pdf/FR327/FR327.pdf	2015	2016	Angola	Cuando Cubango	-16.1608	19.6265	DHS prevalence survey	Microscopy/RDT	129	47.214	1.935	N.R.	N.R.	Y	Y
2017	641	MINSA	2017	https://dhsprogram.com/pubs/pdf/FR327/FR327.pdf	2015	2016	Angola	Namibe	-15.2592	12.7277	DHS prevalence survey	Microscopy/RDT	98	1	1	N.R.	N.R.	Y	Y
2017	NA	Howes	2018 (unpublished)	Forthcoming; DOI: doi:10.4269/ajtmh.18-0417	2014	2014	Madagascar	Central Health Centre	-19.2452	46.1803	Cross-sectional screening	PCR	2063	145	137	7	41	Y	Y
2015	127	Fancony	2012	https://www.ncbi.nlm.nih.gov/pmc/articles/PMC3457352/	2010	2010	Angola	Dande municipality	-6.101	15.1	PR survey	PCR	3316	477	6	7	3	Y	Y
2015	193	Mendes	2011	http://www.ncbi.nlm.nih.gov/pubmed/21713024	2006	2007	Angola	Gabela	-10.854	14.37	PR survey	PCR	238	125	2	N.R.	N.R.	Y	Y
2015	193	Mendes	2011	http://www.ncbi.nlm.nih.gov/pubmed/21713024	2006	2007	Angola	Porto Amboim	-10.732	13.76	PR survey	PCR	226	61	2	N.R.	N.R.	Y	Y
2015	193	Mendes	2011	http://www.ncbi.nlm.nih.gov/pubmed/21713024	2006	2007	Angola	Kissala-Sumbe	-11.2123	13.8477	PR survey	PCR	182	19	0	N.R.	N.R.	N	N
2015	193	Mendes	2011	http://www.ncbi.nlm.nih.gov/pubmed/21713024	2006	2007	Angola	Praia-Sumbe	-11.2005	13.8359	PR survey	PCR	202	36	0	N.R.	N.R.	N	N
2015	193	Mendes	2011	http://www.ncbi.nlm.nih.gov/pubmed/21713024	2006	2007	Angola	Funda	-8.849	13.563	PR survey	PCR	50	14	1	N.R.	N.R.	Y	Y
2015	193	Mendes	2011	http://www.ncbi.nlm.nih.gov/pubmed/21713024	2005	2005	Equatorial Guinea	Miyobo	1.75	10.1667	PR survey	PCR	44	37	6	N.R.	N.R.	Y	Y
2015	193	Mendes	2011	http://www.ncbi.nlm.nih.gov/pubmed/21713024	2005	2005	Equatorial Guinea	Ngonamanga	2.15	9.8	PR survey	PCR	53	43	0	N.R.	N.R.	N	N
2015	934	Fru-Cho	2014	http://www.ncbi.nlm.nih.gov/pubmed/24886496	2008	2009	Cameroon	Bolifamba	4.167	9.299	PR survey	PCR	269	74	13	0	9	Y	Y
