# Supplementary material for: Growing evidence of Plasmodium vivax across malaria-endemic Africa
Source: PLoS Negl Trop Dis. 2019 Jan 31;13(1):e0007140. doi: 10.1371/journal.pntd.0007140 (PMC6372205; doi:10.1371/journal.pntd.0007140)
Supplement: S4 Table — NR: not reported. (XLSX) [file pntd.0007140.s013.xlsx]

## Sheet: Table_S4_serology
Search year	Reference ID	Author	Publication year	URL	Year start	Year end	Country	Site	Latitude	Longitude	Study type	Method/Antibodies	Total tested Pv	Pv_sero	Total tested Pf	Pf_sero	Included in evidence weighting
2017	11	Amanfo	2016	https://www.ncbi.nlm.nih.gov/pubmed/27165412	1994	1994	Zimbabwe	Chiredzie	-21.04	31.674	Serological Survey	MSP-1	100	1	N.R.	N.R.	Y
2017	16	Ashton	2015	https://www.ncbi.nlm.nih.gov/pubmed/25962770	2009	2009	Ethiopia	197 schools	N.R.	N.R.	Serological Survey	Glutamate-Rich Protein (GLURP)	5053	52	5053	30	N
2017	190	Poirier	2016	https://www.ncbi.nlm.nih.gov/pubmed/27887647	2009	2010	Benin	Geolocated to an approximate centre of the six departments where blood collection occurred	6.75019	2.28768	Study on Beninese blood donors	ELISA detection of anti-rPvMSP1	1234	354	N.R.	N.R.	Y
2017	190	Poirier	2016	https://www.ncbi.nlm.nih.gov/pubmed/27887647	2009	2010	Benin	Geolocated to an approximate centre of the six departments where blood collection occurred	6.75019	2.28768	Study on Beninese blood donors	ELISA detection of anti-rPvCSP1	1234	266	N.R.	N.R.	Y
2017	190	Poirier	2016	https://www.ncbi.nlm.nih.gov/pubmed/27887647	2009	2010	Benin	Geolocated to an approximate centre of the six departments where blood collection occurred	6.75019	2.28768	Study on Beninese blood donors	ELISA detection of anti-rPvCSP1 AND anti-rPVMSP1	1234	187	N.R.	N.R.	Y
2017	411	Yalew	2017	https://www.ncbi.nlm.nih.gov/pubmed/28595603	2013	2013	Ethiopia	16 woredas in Amhara region. Found the centroid of the entire region	11.6538	38.3658	Cross-sectional household survey	MSP-1; AMA-1	7878	2705	7878	3352	Y
2017	547	Niang	2017	https://www.ncbi.nlm.nih.gov/pubmed/29284488	2010	2011	Senegal	Catholic Mission School, Kedougou	12.5598	-12.1763	Screening of participants of longitudinal survey (asymptomatic children at enrollment) for co-circulation of Pv and Pf	ELISA detection of anti-rPfMSP1p19 AND anti-rPvMSP1	48	28	48	31	Y
2017	609	Plucinski	2018	https://www.ncbi.nlm.nih.gov/pubmed/29444078	2013	2013	Mozambique	Nacala-a-Velha	-14.566	40.723	Cross-sectional serology survey following LLIN distribution	ELISA detection of anti-rPvMSP1	539	16	N.R.	N.R.	Y
2017	609	Plucinski	2018	https://www.ncbi.nlm.nih.gov/pubmed/29444078	2013	2013	Mozambique	Mecuburi	-14.657	38.891	Cross-sectional serology survey following LLIN distribution	ELISA detection of anti-rPvMSP1	598	24	N.R.	N.R.	Y
2017	609	Plucinski	2018	https://www.ncbi.nlm.nih.gov/pubmed/29444078	2014	2014	Mozambique	Nacala-a-Velha	-14.566	40.723	Cross-sectional serology survey following LLIN distribution	ELISA detection of anti-rPvMSP1	578	12	N.R.	N.R.	Y
2017	609	Plucinski	2018	https://www.ncbi.nlm.nih.gov/pubmed/29444078	2014	2014	Mozambique	Mecuburi	-14.657	38.891	Cross-sectional serology survey following LLIN distribution	ELISA detection of anti-rPvMSP1	704	14	N.R.	N.R.	Y
2015	101	Khaireh	2012	https://www.ncbi.nlm.nih.gov/pubmed/23190709	2002	2002	Djibouti	Djibouti	11.594	43.144	Non-correlated cluster sampling method	PvMSP1-19; PvMSP1-42; lots of Pf ones	1910	334	1910	602	Y
2015	256	Bousema	2010	http://www.ncbi.nlm.nih.gov/pubmed/21713024	2008	2008	Somalia	Ceel Bardaale	9.85787	43.4898	Cross-sectional	MSP-1; AMA-1	648	131	619	126	Y
2015	256	Bousema	2010	http://www.ncbi.nlm.nih.gov/pubmed/21713024	2008	2008	Somalia	Badahabo	9.68379	43.5546	Cross-sectional	MSP-1; AMA-1	148	31	138	30	Y
2015	256	Bousema	2010	http://www.ncbi.nlm.nih.gov/pubmed/21713024	2008	2008	Somalia	Xuunshaley	9.72258	43.4209	Cross-sectional	MSP-1; AMA-1	248	40	244	23	Y
2015	274	Culleton	2009	http://www.ncbi.nlm.nih.gov/pubmed/19803728	2007	2007	Congo	Pointe-Noire	-4.778	11.863	PCD at health centre	PvCSP; PvMSP1; PfMSP1; (pre-erythrocytic) ELISA	409	55	409	197	Y
2015	934	Fru-Cho	2014	http://www.ncbi.nlm.nih.gov/pubmed/24886496	2008	2009	Cameroon	Bolifamba	4.167	9.299	Cross-sectional	anti-MSP/CSP	269	3	269	180	Y
